# Supplementary material
Source: PubMed Central journal article supplement (PMC4519695)

**A**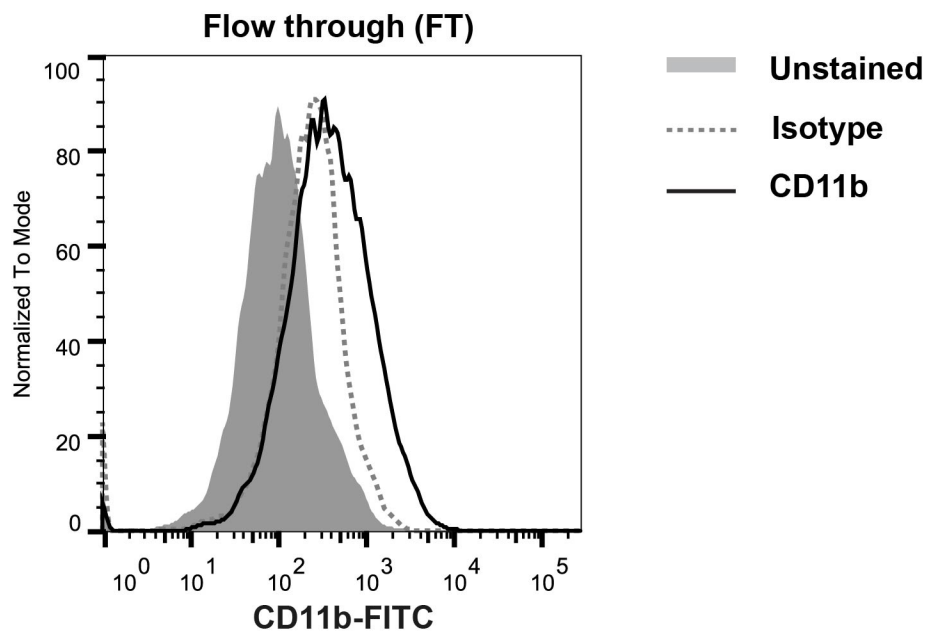**B**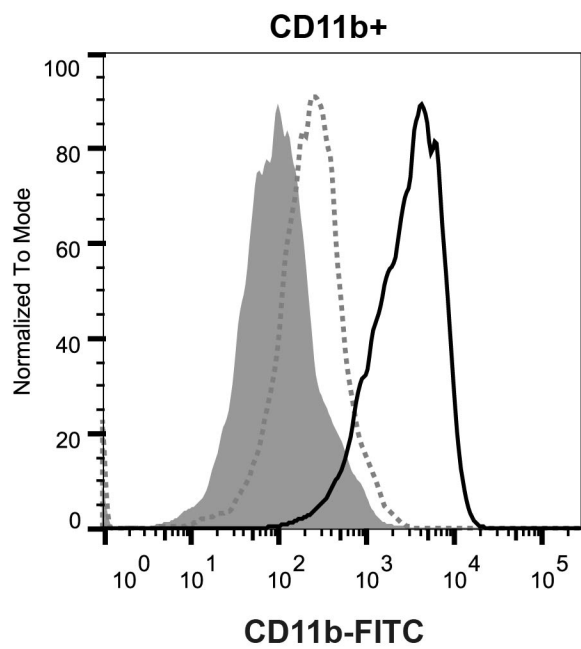

**A**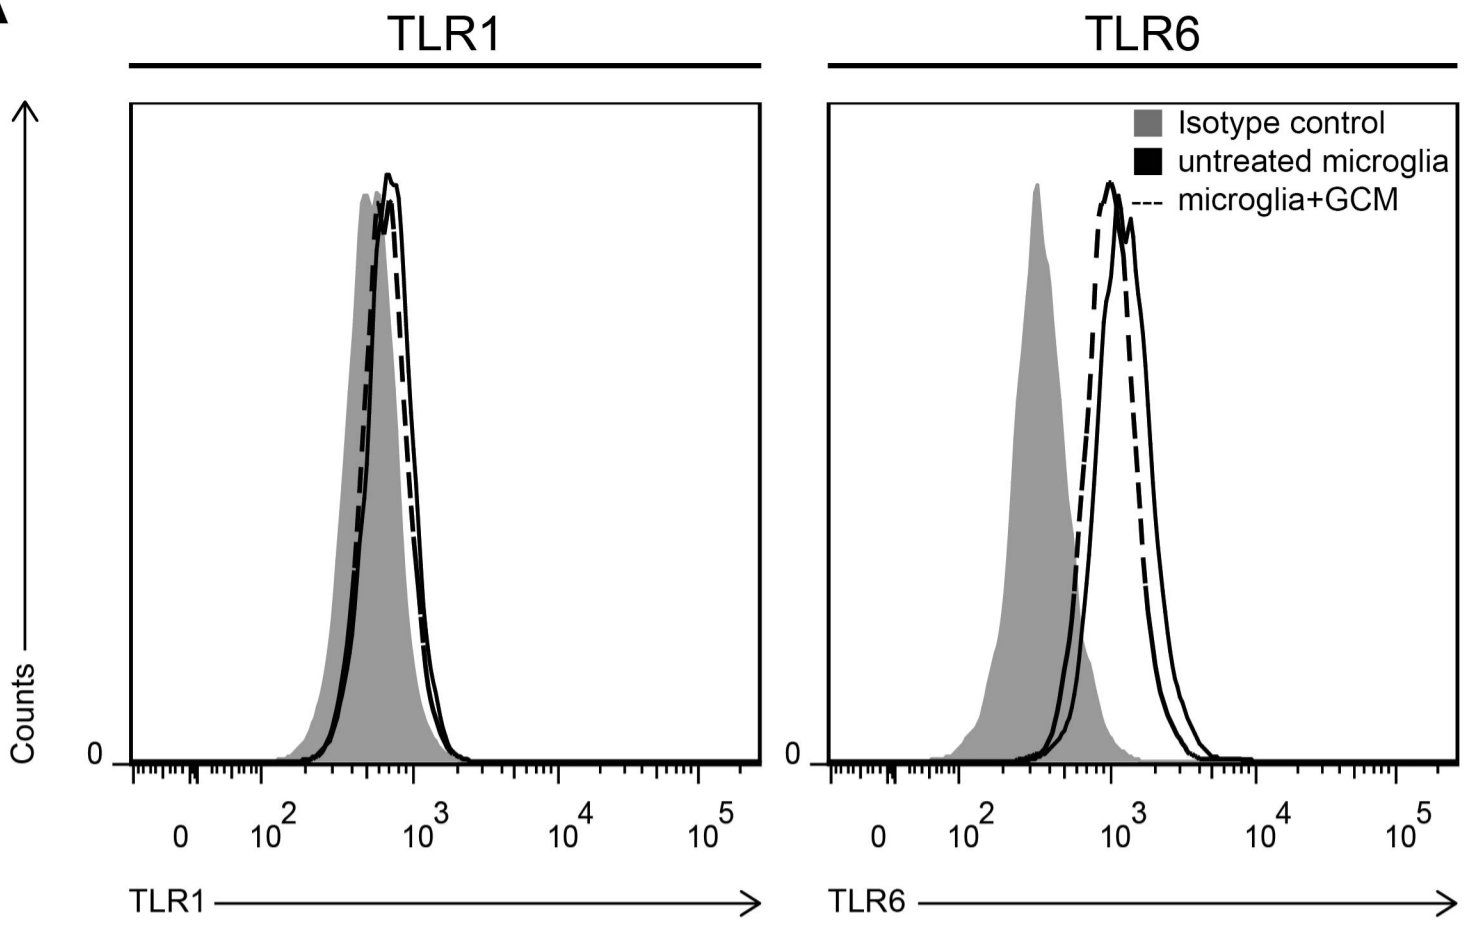**B**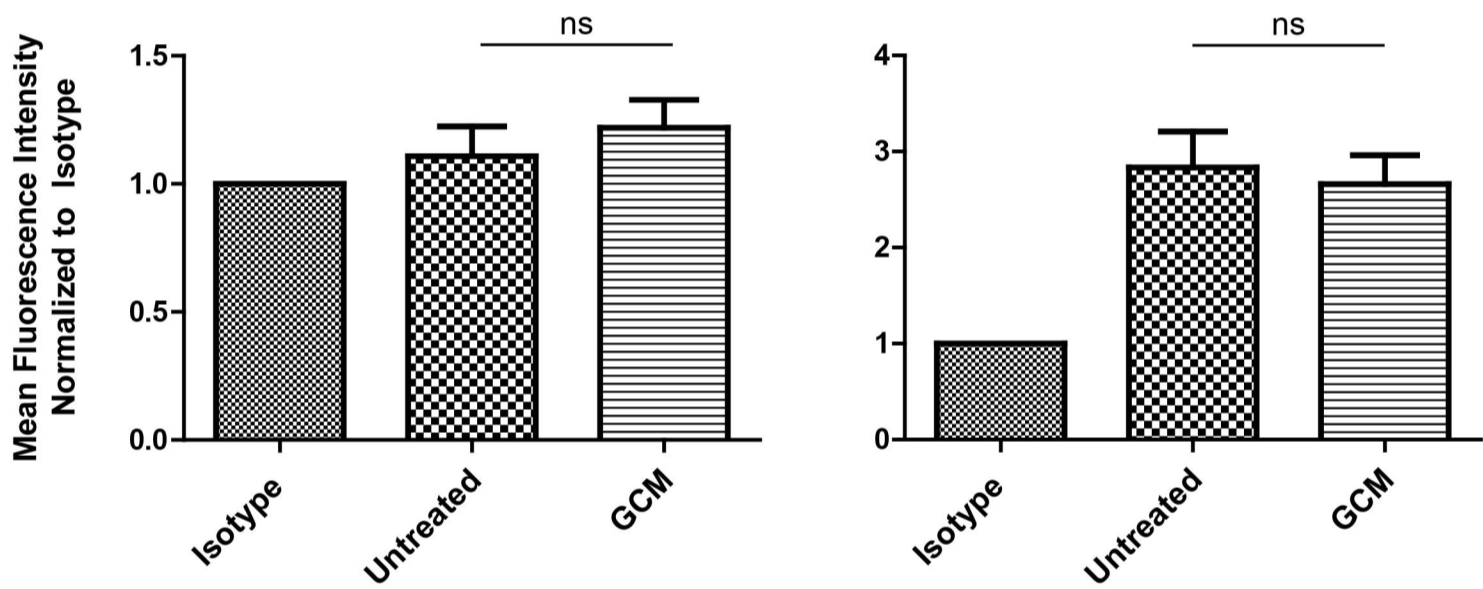**Supplementary Fig. 2**

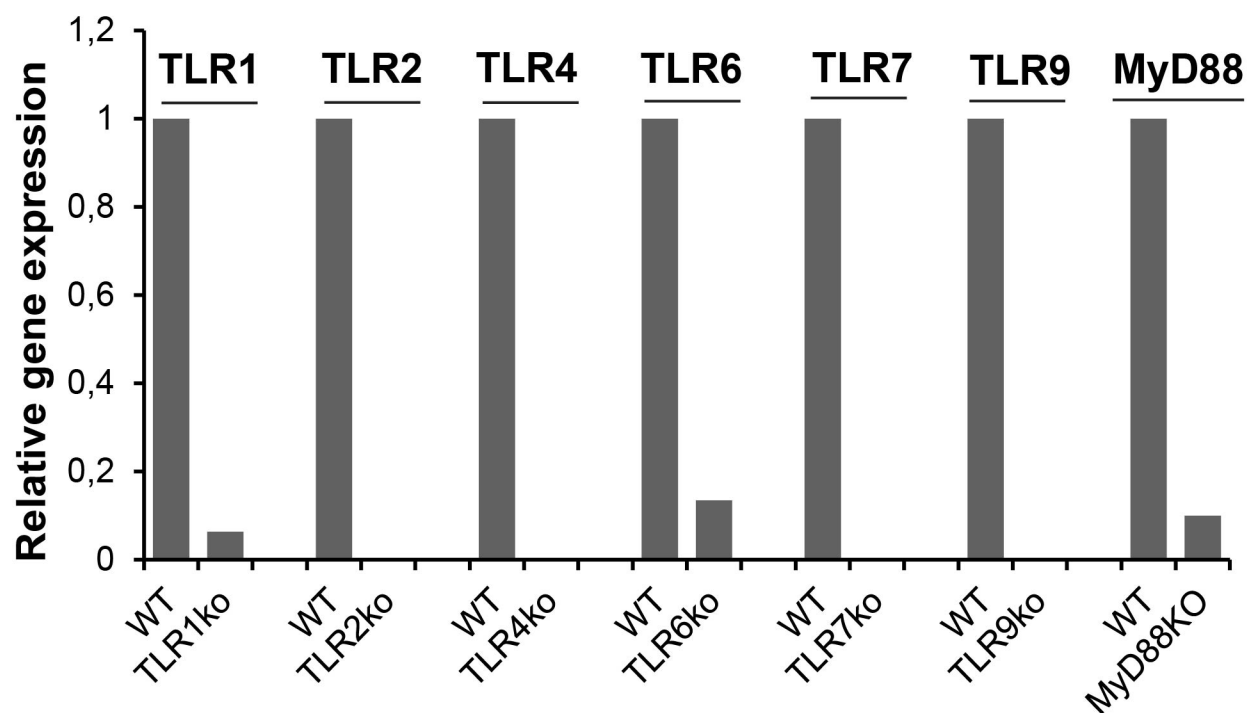

**Supplementary Fig. 3**

DAPI

Iba1+mCherry+MMP9

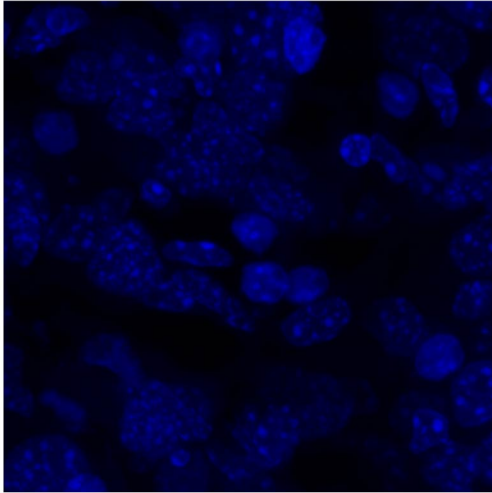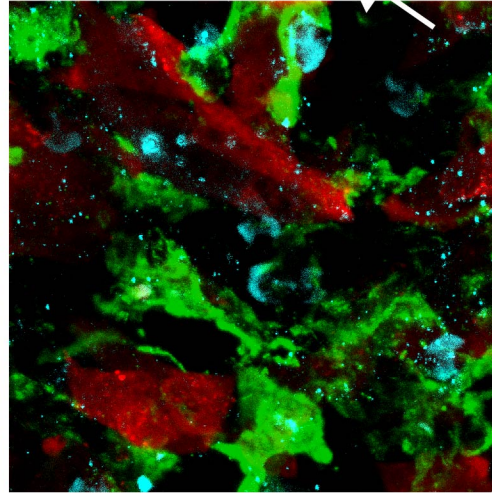

Supplementary Fig. 4

Supplement: NIHMS619703-supplement-Supp_FigureS1-S4.pdf [file NIHMS619703-supplement-Supp_FigureS1-S4.pdf]
